# Supplementary material for: Global changes in chromatin accessibility and transcription in growth hormone-secreting pituitary adenoma
Source: Springer Nature journal article supplement (doi:10.1007/s12020-022-03155-z), 2022-08-10

**A** all genes (Jensen-Shannon Divergence)

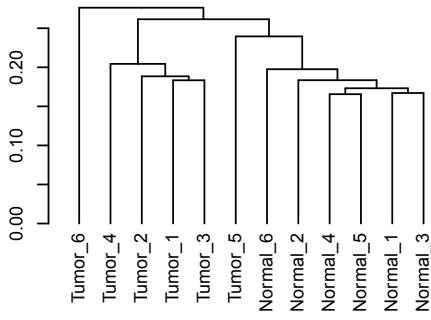

**B**

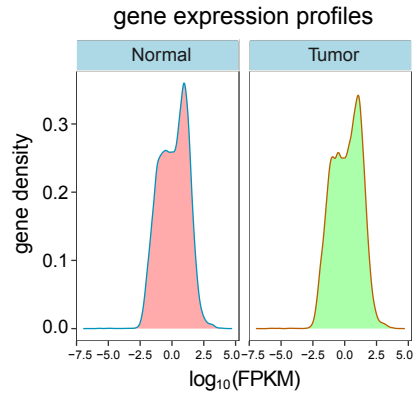

**C**

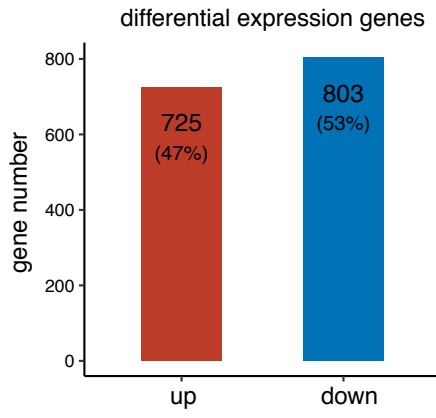

**D**

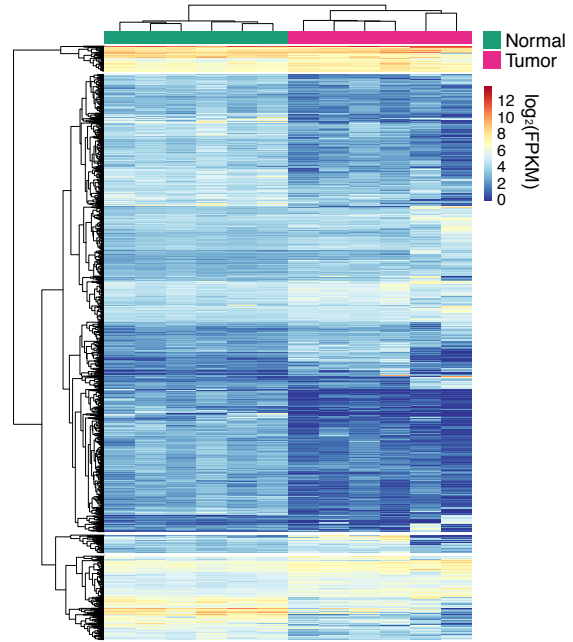

Supplement: MOESM1 [file 23354404]
