# Supplementary material for: Global changes in chromatin accessibility and transcription in growth hormone-secreting pituitary adenoma
Source: Springer Nature journal article supplement (doi:10.1007/s12020-022-03155-z), 2022-08-10

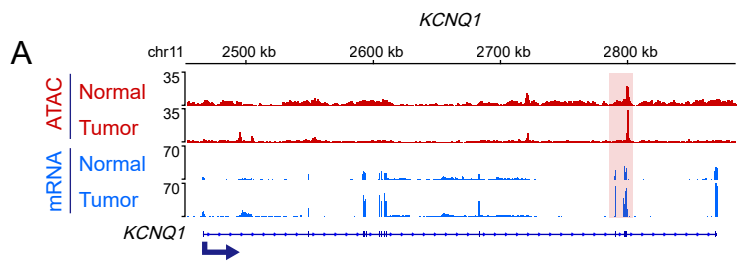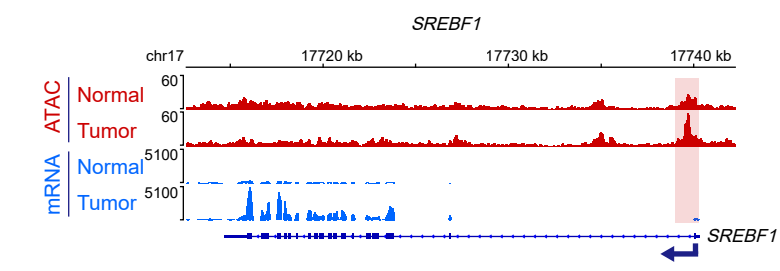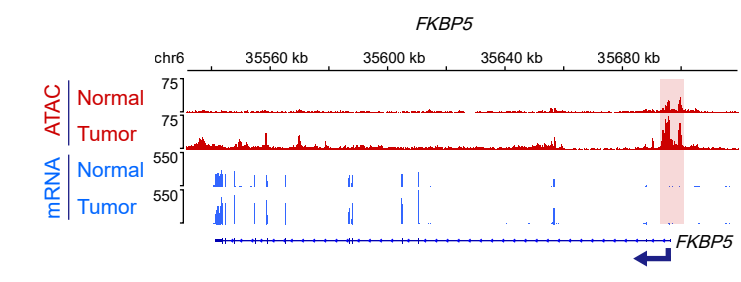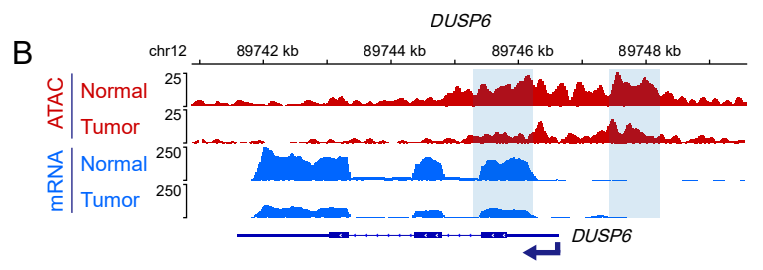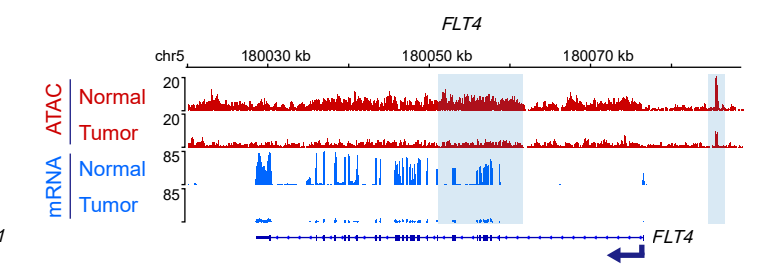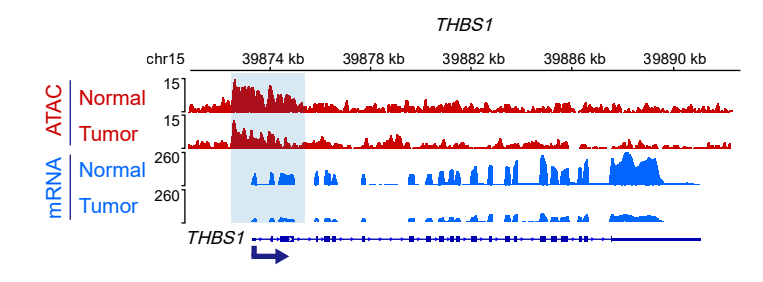

Supplement: MOESM2 [file 23354404]
